# Supplementary material for: Long noncoding AGAP2-AS1 is activated by SP1 and promotes cell proliferation and invasion in gastric cancer
Source: J Hematol Oncol. 2017 Feb 16;10:48. doi: 10.1186/s13045-017-0420-4 (PMC5314629; doi:10.1186/s13045-017-0420-4)
Supplement: Additional file 1: Table S1. — Primers, siRNAs and shRNAs sequence. (XLSX 13 kb) [file 13045_2017_420_MOESM1_ESM.xlsx]

## Sheet: Sheet1
Primers for qPCR
GAPDH F	GGGAGCCAAAAGGGTCAT
GAPDH R	GAGTCCTTCCACGATACCAA
AGAP2-AS1 F	TACCTTGACCTTGCTGCTCTC
AGAP2-AS1 R	TGTCCCTTAATGACCCCATCC
KLF2 F	CTGCACATGAAACGGCACAT
KLF2 R	CAGTCACAGTTTGGGAGGGG
P21 P-1570F	GGTGTCTAGGTGCTCCAGGT
P21 P-1570R	GCACTCTCCAGGAGGACACA
P15 F	GGACTAGTGGAGAAGGTGCG
P15 R	GGGCGCTGCCCATCATCATG
P16 F	GATCCAGGTGGGTAGAAGGTC
P16 R	GATCCAGGTGGGTAGAAGGTC
U1 F	GGGAGATACCATGATCACGAAGGT
U1 R	CCACAAATTATGCAGTCGAGTTTCCC
TIMP3 F	CATGTGCAGTACATCCATACGG
TIMP3 R	CATCATAGACGCGACCTGTCA
P21 F	AAGTCAGTTCCTTGTGGAGCC
P21 R	GGTTCTGACGGACATCCCCA
PTEN F	TGGATTCGACTTAGACTTGACCT
PTEN R	GGTGGGTTATGGTCTTCAAAAGG
LATS1 F	AATTTGGGACGCATCATAAAGCC
LATS1 R	TCGTCGAGGATCTTGGTAACTC
LATS2 F	ACCCCAAAGTTCGGACCTTAT
LATS2 R	CATTTGCCGGTTCACTTCTGC
RND1 F	GATGTAAGCTCGTTCTGGTCG
RND1 R	AGCAATCCTTCGCTAACACTTG
E-cadherin P-104F	TAGAGGGTCACCGCGTCTAT
E-cadherin P-104R	CGTACCGCTGATTGGCTGAG
E-cadherin F	CGAGAGCTACACGTTCACGG
E-cadherin R	GGGTGTCGAGGGAAAAATAGG
siRNA sequence
si-AGAP2-AS1 1#	CCACTCCACCTCAAACTCTTACCTT
si-AGAP2-AS1 2#	GGGTCATTAAGGGACAGAGTTCAAG
si-EZH2-1	AAGACTCTGAATGCAGTTGCT
si-EZH2-2	CGGCUUCCCAAUAACAGUATT
si-LSD1-1	CAACCTCTCAGAAGATGAGTATTAT
si-LSD1-2	CAAAGGAAACTATGTAGCTGATCTT
si-LATS2	CAGGTGGACTCACAATTCCAAATAT
shRNA sequence
sh-AGAP2-AS1 1#	CACCGCCACTCCACCTCAAACTCTTACCTTCGAAAAGGTAAGAGTTTGAGGTGGAGTGG
sh-AGAP2-AS1 2#	CACCGGGTCATTAAGGGACAGAGTTCAAGCGAACTTGAACTCTGTCCCTTAATGACCC
